# Supplementary material for: The Analysis of the Mycobiota in Plastic Polluted Soil Reveals a Reduction in Metabolic Ability
Source: MDPI journal article supplement (doi:10.3390/jof8121247), 2022-11-25
Supplement: s1 [file s1]

**Table S1.** Carbon substrates of Biolog EcoPlate™ divided into six categories

| Amines           | Amino acids           | Carbohydrates                      | Carboxylic acids                    | Phenolic compounds        | Polymers                |
|------------------|-----------------------|------------------------------------|-------------------------------------|---------------------------|-------------------------|
| Phenylethylamine | L-Arginine            | $\beta$ -Methyl-D-Glucoside        | D-Galactonic Acid $\gamma$ -Lactone | Pyruvic Acid Methyl Ester | Tween 40                |
| Putrescine       | L-Asparagine          | D-Xylose                           | D-Galacturonic Acid                 | D-Mannitol                | Tween 80                |
|                  | L-phenylalanine       | i-Erythritol                       | 2-Hydroxy Benzoic Acid              | N-Acetyl-D-Glucosamine    | $\alpha$ - Cyclodextrin |
|                  | L-Serine              | D,L- $\alpha$ - Glycerol Phosphate | 4-Hydroxy Benzoic Acid              |                           | Glycogen                |
|                  | L-Threonine           | D-Cellobiose                       | $\gamma$ -Amino Butyric Acid        |                           |                         |
|                  | Glycyl-Lglutamic Acid | Glucose-1-Phosphate                | D-Glucosaminic Acid                 |                           |                         |
|                  |                       | $\alpha$ -D-Lactose                | Itaconic Acid                       |                           |                         |
|                  |                       |                                    | $\alpha$ -Keto Butyric Acid         |                           |                         |
|                  |                       |                                    | D-Malic Acid                        |                           |                         |
