# Supplementary material for: The Analysis of the Mycobiota in Plastic Polluted Soil Reveals a Reduction in Metabolic Ability
Source: MDPI journal article supplement (doi:10.3390/jof8121247), 2022-11-25
Supplement: s1 [file s1]

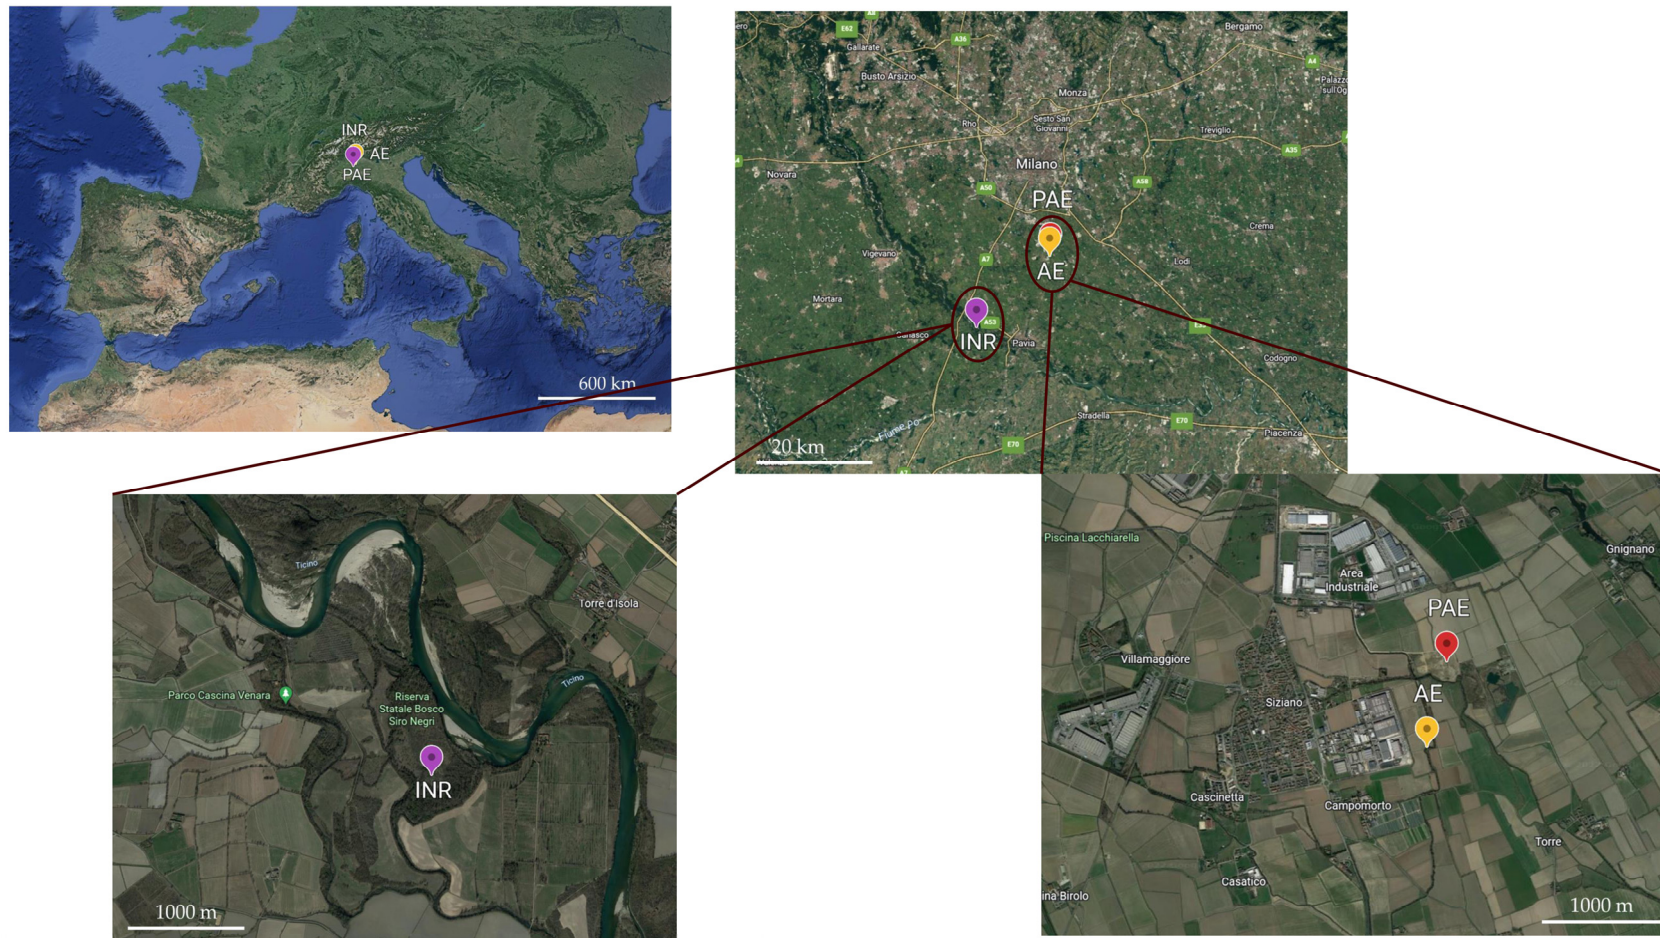

**Figure S1.** Map of sampled sites. PAE: Polluted AgroEcosystem; AE: AgroEcosystem; INR: Integral Natural Reserve.
